# Supplementary material for: Flexible parsing, interpretation, and editing of technical sequences with splitcode
Source: Oxford University Press journal article supplement (doi:10.1093/bioinformatics/btae331), 2024-06-01
Supplement: btae331_supplementary_data.zip [file btae331_supplementary_data.zip]

**Supplementary Table S1:**

| Option                                 | Description                                                 | Additional info                                                                                               |
|----------------------------------------|-------------------------------------------------------------|---------------------------------------------------------------------------------------------------------------|
| <b>Sequence Identification Options</b> |                                                             |                                                                                                               |
| tag                                    | Tag sequence                                                | String of ATCG bases. Alternately, can supply a file containing multiple tag sequences.                       |
| id                                     | Tag name/ID                                                 |                                                                                                               |
| distance                               | Allowable error tolerance                                   | Supports setting hamming distance allowance, indel allowance, and total error (hamming+indel) allowance.      |
| location                               | Where a tag should be searched for in a read                | Can specify file, start position, and end position.                                                           |
| group                                  | Tag group name/ID                                           | Tags can be grouped together under a group name                                                               |
| minFinds                               | Minimum number of times a tag must be found in a read       | If this isn't met, the read is discarded                                                                      |
| minFindsG                              | Minimum number of times a tag group must be found in a read | If this isn't met, the read is discarded                                                                      |
| maxFinds                               | Maximum number of times a tag can be found in a read        | Once this is reached, the program simply stops looking for that tag                                           |
| maxFindsG                              | Maximum number of times a tag group can be found in a read  | Once this is reached, the program simply stops looking for any tag belonging to that group                    |
| left                                   | Whether the tag should be a left trimming point             | At the location the tag is found, that tag and all bases to the left of the tag in the read are removed       |
| right                                  | Whether the tag should be a right trimming point            | At the location the tag is found, that tag and all bases to the right of the tag in the read are removed      |
| next                                   | What tag ID or group ID must come after the tag             | When the tag is found, only the tag ID or group ID specified as "next" will be searched for                   |
| previous                               | What tag ID or group ID must come before the tag            | The tag will not be searched for unless the tag ID or group ID specified as "previous" was found right before |
| sub                                    | Sequence to substitute tag with when tag is found in read   | Note: This is useful for error correction and one can also                                                    |

|                                                 |                                                                            |                                                                                                                         |
|-------------------------------------------------|----------------------------------------------------------------------------|-------------------------------------------------------------------------------------------------------------------------|
|                                                 |                                                                            | specify substituting the original tag sequence in if an error-ridden version of the tag was found                       |
| partial5                                        | Specifies tag may be truncated at the 5' end                               | Can specify the minimum number of bases that must match as well as the mismatch frequency. Useful for adapter trimming. |
| partial3                                        | Specifies tag may be truncated at the 3' end                               | Can specify the minimum number of bases that must match as well as the mismatch frequency. Useful for adapter trimming. |
| <b>Read Modification and Extraction Options</b> |                                                                            |                                                                                                                         |
| extract                                         | Pattern(s) describing how to extract UMI and UMI-like sequences from reads | Multiple extractions can be specified (e.g. if there are two UMI sequences in the read structure).                      |
| trim-5                                          | Number of base pairs to trim from the 5'-end of reads                      |                                                                                                                         |
| trim-3                                          | Number of base pairs to trim from the 3'-end of reads                      |                                                                                                                         |
| filter-len                                      | Filter reads based on length                                               |                                                                                                                         |
| qtrim                                           | Threshold for quality trimming                                             |                                                                                                                         |

The features specified in **Supplementary Table S1** relate to read editing and tag identification. Downstream of the tag identification process, there are more options to further process identified tags. For example, using the --keep and --keep-grp command-line options, a user can specify combination(s) of tags or tag groups that should be retained and only those reads will be kept. Likewise, using the --discard and --discard-grp command-line options, a user can specify a combination(s) that should be discarded and those reads will be discarded. Furthermore, using the --keep and --keep-grp options, a user can specify specific combinations to be outputted into specific files, enabling demultiplexing based on barcodes or barcode combinations.
